# Supplementary material for: Synthesis of benzoxazoles via an iron-catalyzed domino C–N/C–O cross-coupling reaction
Source: PubMed Central journal article supplement (PMC9077259; doi:10.1039/c7ra13080e), 2018-01-09

## Synthesis of Benzoxazoles via Iron-Catalyzed Domino C–N/C–O

### Cross-Coupling Reaction

Bo Yang, Weiye Hu and Songlin Zhang\*

Key Laboratory of Organic Synthesis of Jiangsu Province, College of Chemistry, Chemical Engineering and Materials Science, Soochow University, Suzhou 215123, P. R. China

#### Table of contents:

|                                                                        |    |
|------------------------------------------------------------------------|----|
| General Information.....                                               | S2 |
| Synthesis of 2-phenylbenzo[ <i>d</i> ]oxazole. General procedure ..... | S2 |
| <sup>1</sup> H and <sup>13</sup> C of all compounds .....              | S6 |

## General Information

All of the reagents and solvents were used directly as obtained commercially unless otherwise noted. Petroleum ether (PE) used refers to the 60-90 °C boiling point fraction of petroleum. Column chromatography was performed with 300-400 mesh silica gel using flash column techniques. <sup>1</sup>H and <sup>13</sup>C NMR spectra were determined in CDCl<sub>3</sub> on a Varian-Inova 400MHz spectrometer and chemical shifts were measured relative to the signals for residual chloroform (7.26 ppm) in the deuterated solvent, unless otherwise stated. Chemical shifts in <sup>13</sup>C NMR spectra are reported relative to the central line of the DMSO (δ = 77.00 ppm).

## Synthesis of 2-phenylbenzo[d]oxazole. General procedure.

Benzamide (0.5 mmol), Fe<sub>2</sub>O<sub>3</sub> (0.1 mmol), and K<sub>2</sub>CO<sub>3</sub> (0.5 mmol) were weighed into an oven-dried Schlenk tube which was sealed with a plug and an nitrogen atmosphere was established. Then, DMEDA (0.1 mmol), 1,2-dibromobenzene (0.45 mmol) and PhMe (2 mL) was added via syringe. The Schlenk tube was heated to 110 °C and stirring for 48 h. When the reaction complete, the heterogeneous mixture was cooled to room temperature and diluted with water and ethoxyethane. The organic solution was washed with brine, dried (Na<sub>2</sub>SO<sub>4</sub>), and purified by column chromatography on silica gel (eluting with 20:1 petroleum ether:ethyl acetate) to give desired 2-phenylbenzo[d]oxazole.

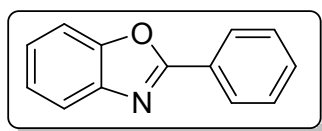

**2-phenylbenzo[d]oxazole(3a):** white solid; yield: 84.8 mg (87%); mp=102-104 °C; <sup>1</sup>H NMR (400 MHz, CDCl<sub>3</sub>): δ=8.26-8.24 (m, 2H), 7.78-7.76 (m, 1H), 7.58-7.55 (m, 1H), 7.52-7.49 (m, 3H), 7.36-7.33 (m, 2H); <sup>13</sup>C NMR (100 MHz, CDCl<sub>3</sub>): δ =163.0, 150.7, 142.1, 131.5, 128.9, 127.6, 127.1, 125.1, 124.5, 120.0, 110.5; HRMS(EI) calcd for C<sub>13</sub>H<sub>9</sub>NO (M<sup>+</sup>): 195.0684; found: 195.0686.

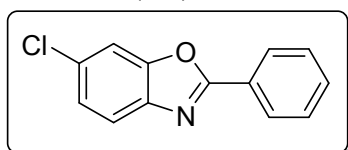

## 6-chloro-2-phenylbenzo[d]oxazole(3b)

white solid; mp=107-108 °C; <sup>1</sup>H NMR (400 MHz, CDCl<sub>3</sub>): δ=8.23-8.21 (m, 2H), 7.67 (d, J=8.48 Hz, 1H), 7.59-7.50 (m, 4H), 7.34-7.32 (m, 1H); <sup>13</sup>C NMR (100 MHz, CDCl<sub>3</sub>): δ=163.7, 150.9, 140.9, 131.8, 130.7, 129.0, 127.6, 126.7, 125.3, 120.5, 111.2; HRMS(EI) calcd for C<sub>13</sub>H<sub>8</sub><sup>35</sup>ClNO (M<sup>+</sup>): 229.0294; found: 229.0294.

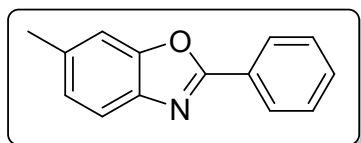

## 6-methyl-2-phenylbenzo[d]oxazole(3c)

white solid; yield: 83.6 mg (80%); mp=94-94.5 °C; <sup>1</sup>H NMR (400 MHz, CDCl<sub>3</sub>): δ =8.24-8.22 (m,

2H), 7.64 (d, J=8.08 Hz, 1H), 7.51 (s, 3H), 7.37 (s, 1H), 7.16 (d, J=7.96 Hz, 1H), 2.50 (s, 3H);  $^{13}\text{C}$  NMR (100 MHz,  $\text{CDCl}_3$ ):  $\delta$ =162.5, 151.0, 139.9, 135.5, 131.2, 128.8, 127.4, 127.3, 125.8, 119.3, 110.7, 21.8; HRMS(EI) calcd for  $\text{C}_{14}\text{H}_{11}\text{NO}$  ( $\text{M}^+$ ): 209.0841; found: 209.0838.

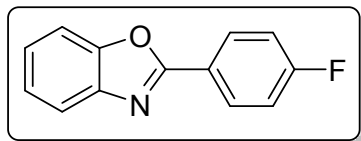

**2-(4-fluorophenyl)benzo[d]oxazole(3d)**

white solid; yield: 61.8 mg (58%). mp=92-95°C;  $^1\text{H}$  NMR (400 MHz,  $\text{CDCl}_3$ ):  $\delta$ = 8.27-8.23 (m, 2H), 7.77-7.75 (m, 1H), 7.58-7.56 (m, 1H), 7.36-7.34 (m, 2H), 7.21 (t, J=8.64 Hz, 2H);  $^{13}\text{C}$  NMR (100 MHz,  $\text{CDCl}_3$ ):  $\delta$ =164.8 (d,  $^1\text{J}_{\text{C-F}}$ =251 Hz), 162.1, 150.8, 142.0, 129.8 (d,  $^3\text{J}_{\text{C-F}}$ =8.82 Hz), 159.1, 124.6, 123.5, 120.0, 116.2 (d,  $^2\text{J}_{\text{C-F}}$ = 22.06 Hz), 110.6; HRMS(EI) calcd for  $\text{C}_{13}\text{H}_8\text{FNO}$  ( $\text{M}^+$ ): 213.0590; found: 213.0585.

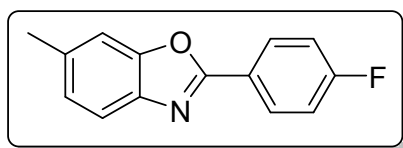

**2-(4-fluorophenyl)-6-methylbenzo[d]oxazole(3e)**

white solid; yield: 104 mg (92%). mp=113-116°C;  $^1\text{H}$  NMR (400 MHz,  $\text{CDCl}_3$ ):  $\delta$ =8.21 (s, 2H), 7.61 (d, J=7.96Hz, 1H), 7.35 (s, 1H), 7.17 (q, J=8.28 Hz, 3H), 2.49 (s, 3H);  $^{13}\text{C}$  NMR (100 MHz,  $\text{CDCl}_3$ ):  $\delta$ =164.6 (d,  $^1\text{J}_{\text{C-F}}$ =250.9 Hz), 161.6, 151.0, 139.8, 135.6, 129.6 (d,  $^3\text{J}_{\text{C-F}}$ =8.75 Hz), 125.8, 123.7, 119.3, 116.1 (d,  $^2\text{J}_{\text{C-F}}$ =22.02 Hz), 110.7, 21.8; HRMS(EI) calcd for  $\text{C}_{14}\text{H}_{11}\text{NO}$  ( $\text{M}^+$ ): 227.0746; found: 227.0740.

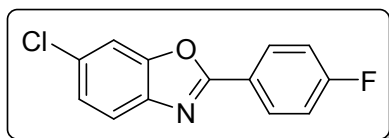

**6-chloro-2-(4-fluorophenyl)benzo[d]oxazole(3f)**

white solid; yield: 105 mg (85%). mp=132-133°C;  $^1\text{H}$  NMR (400 MHz,  $\text{CDCl}_3$ ):  $\delta$ =8.22 (t, J=5.56 Hz, 2H), 7.65 (d, J=8.4 Hz, 1H), 7.56 (s, 1H), 7.33 (d, J=8.16 Hz, 1H), 7.21 (t, J=8.36 Hz, 2H);  $^{13}\text{C}$  NMR (100 MHz,  $\text{CDCl}_3$ ):  $\delta$ =165.0 (d,  $^1\text{J}_{\text{C-F}}$ =251.84 Hz), 162.8, 150.9, 140.8, 130.7, 129.9 (d,  $^3\text{J}_{\text{C-F}}$ =8.92 Hz), 125.4, 123.0, 120.4, 116.3 (d,  $^2\text{J}_{\text{C-F}}$ =22.08 Hz), 111.2; HRMS(EI) calcd for  $\text{C}_{14}\text{H}_9\text{ClFNO}$  ( $\text{M}^+$ ): 247.0200; found: 247.0202.

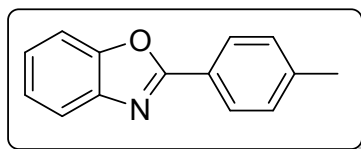

**2-p-tolylbenzo[d]oxazole(3g)**

white solid; yield: 73.2 mg (70%). mp=116-117°C;  $^1\text{H}$  NMR (400 MHz,  $\text{CDCl}_3$ ):  $\delta$ = 8.13 (d, J=8.2 Hz, 2H), 7.76-7.74 (m, 1H), 7.56-7.54 (m, 1H), 7.35-7.30 (m, 4H), 2.42 (s, 3H);  $^{13}\text{C}$  NMR (100 MHz,  $\text{CDCl}_3$ ):  $\delta$ =163.2, 150.6, 142.1, 142.0, 129.6, 127.5, 124.8, 124.4, 124.3, 119.8, 110.4, 21.6; HRMS(EI) calcd for  $\text{C}_{14}\text{H}_{11}\text{NO}$  ( $\text{M}^+$ ):209.0841; found: 209.0840.

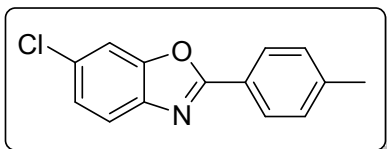

**6-chloro-2-p-tolylbenzo[d]oxazole(3h)**

white solid; yield: 78.9 mg (65%). mp=126-128°C; <sup>1</sup>H NMR (400 MHz, CDCl<sub>3</sub>): δ=8.09 (d, J=8.24 Hz, 2H), 7.64 (d, J= 8.48 Hz, 1H), 7.55 (s, 1H), 7.32-7.29 (m, 3H), 2.43 (s, 3H); <sup>13</sup>C NMR (100 MHz, CDCl<sub>3</sub>): δ=163.9, 150.8, 142.4, 140.9, 130.4, 129.7, 127.6, 125.1, 123.9, 120.2, 111.1, 21.6; HRMS(EI) calcd for C<sub>14</sub>H<sub>10</sub>ClNO (M<sup>+</sup>): 243.0451; found: 243.0450.

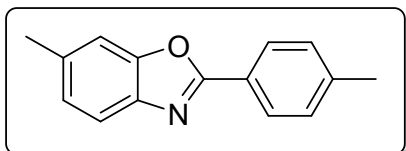

**6-methyl-2-p-tolylbenzo[d]oxazole(3i)**

white solid; yield: 50.18 mg (45%). mp=103-104°C; <sup>1</sup>H NMR (400 MHz, CDCl<sub>3</sub>): δ=8.11 (d, J=8.2 Hz, 2H), 7.62 (d, J=8.08 Hz, 1H), 7.36 (s, 1H), 7.31 (d, J=8.0 Hz, 2H), 7.15 (d, J=8.08 Hz, 1H), 2.49 (s, 3H), 2.42 (s, 3H); <sup>13</sup>C NMR (100 MHz, CDCl<sub>3</sub>): δ=162.8, 151.0, 141.7, 140.0, 135.3, 129.6, 127.4, 125.7, 124.6, 119.1, 110.7, 21.8, 21.6; HRMS(EI) calcd for C<sub>15</sub>H<sub>13</sub>NO (M<sup>+</sup>): 223.0997; found: 223.0991.

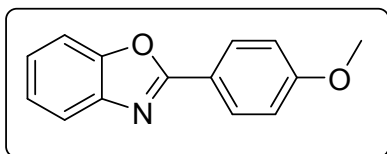

**2-(4-methoxyphenyl)benzo[d]oxazole(3j)**

white solid; yield: 56.2 mg (50%). mp=101°C; <sup>1</sup>H NMR (400 MHz, CDCl<sub>3</sub>): δ=8.19 (d, J= 8.92 Hz, 2H), 7.75-7.72 (m, 1H), 7.56-7.53 (m, 1H), 7.35-7.30 (m, 2H), 7.01 (d, J=8.88 Hz, 2H), 3.87 (s, 3H); <sup>13</sup>C NMR (100 MHz, CDCl<sub>3</sub>): δ=163.1, 162.2, 150.6, 142.2, 129.3, 124.5, 124.4, 119.6, 119.6, 114.3, 110.3, 55.4; HRMS(EI) calcd for C<sub>14</sub>H<sub>11</sub>NO<sub>2</sub> (M<sup>+</sup>): 225.0790; found: 225.0791.

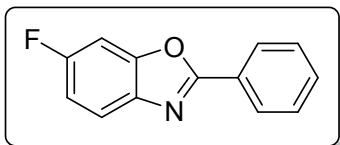

**6-fluoro-2-phenylbenzo[d]oxazole(3k)**

white solid; yield: 53.2 mg (50%). mp=109-110°C; <sup>1</sup>H NMR (400 MHz, CDCl<sub>3</sub>): δ=8.31-8.28 (m, 2H), 7.77 (q, J=4.88 Hz, 1H), 7.61-7.59 (m, 3H), 7.40-7.37 (m, 1H), 7.21-7.15 (m, 1H); <sup>13</sup>C NMR (100 MHz, CDCl<sub>3</sub>): δ=163.7, 160.7 (d, <sup>1</sup>J<sub>C-F</sub>=242.62 Hz), 150.7 (d, <sup>3</sup>J<sub>C-F</sub>=14.57 Hz), 138.4, 131.6, 129.0, 127.5, 126.9, 120.2 (d, <sup>3</sup>J<sub>C-F</sub>=10.05), 112.5 (d, <sup>2</sup>J<sub>C-F</sub>=24.49 Hz), 98.7 (d, <sup>2</sup>J<sub>C-F</sub>=28.03 Hz); HRMS(EI) calcd for C<sub>13</sub>H<sub>8</sub>FNO (M<sup>+</sup>): 213.0590; found: 213.0589.

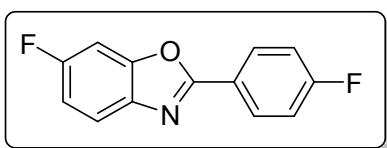

**6-fluoro-2-(4-fluorophenyl)benzo[d]oxazole(3l)**

white solid; yield: 40.4 mg (35%). mp=121-123 °C; <sup>1</sup>H NMR (400 MHz, CDCl<sub>3</sub>): δ=8.22-8.18 (m, 2H), 7.69-7.66 (m, 1H), 7.30-7.26 (m, 1H), 7.23-7.18 (m, 2H), 7.13-7.07 (m, 1H); <sup>13</sup>C NMR (100 MHz, CDCl<sub>3</sub>): δ=164.8 (d, <sup>1</sup>J<sub>C-F</sub>=251.48 Hz), 162.8, 160.6 (d, <sup>1</sup>J<sub>C-F</sub>=242.81 Hz), 150.7 (d, <sup>3</sup>J<sub>C-F</sub>=14.67 Hz), 138.3, 129.7 (d, <sup>3</sup>J<sub>C-F</sub>=8.86 Hz), 123.2 (d, <sup>3</sup>J<sub>C-F</sub>=3.17 Hz), 120.2 (d, <sup>3</sup>J<sub>C-F</sub>=9.99 Hz), 116.2 (d, <sup>2</sup>J<sub>C-F</sub>=22.11 Hz), 112.6 (d, <sup>2</sup>J<sub>C-F</sub>=24.51 Hz), 98.7 (d, <sup>2</sup>J<sub>C-F</sub>=28.04 Hz); HRMS(EI) calcd for C<sub>13</sub>H<sub>7</sub>F<sub>2</sub>NO (M<sup>+</sup>): 231.0496; found: 231.0496.

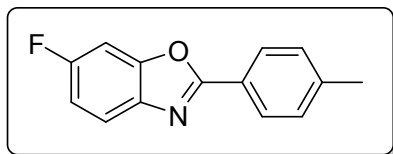**6-fluoro-2-p-tolylbenzo[d]oxazole(3m)**

white solid; yield: 56.8 mg (50%). mp=125-125.6 °C; <sup>1</sup>H NMR (400 MHz, CDCl<sub>3</sub>): δ=8.09 (d, J=8.2 Hz, 2H), 7.67-7.64 (m, 1H), 7.36-7.26 (m, 3H), 7.11-7.05 (m, 1H), 2.42 (s, 3H); <sup>13</sup>C NMR (100 MHz, CDCl<sub>3</sub>): δ=163.9, 160.5 (d, <sup>1</sup>J<sub>C-F</sub>=242.19 Hz), 150.6 (d, <sup>3</sup>J<sub>C-F</sub>=14.58 Hz), 142.1, 138.4, 129.7, 127.4, 124.1, 120.0 (d, <sup>3</sup>J<sub>C-F</sub>=9.98 Hz), 112.3 (d, <sup>2</sup>J<sub>C-F</sub>=24.47 Hz), 98.6 (d, <sup>2</sup>J<sub>C-F</sub>=27.99 Hz), 21.6; HRMS(EI) calcd for C<sub>14</sub>H<sub>10</sub>FNO (M<sup>+</sup>): 227.0746; found: 227.0747.

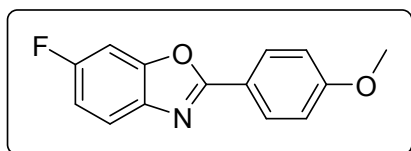**6-fluoro-2-(4-methoxyphenyl)benzo[d]oxazole(3n)**

white solid; yield: 65.6 mg (54%). mp=155 °C; <sup>1</sup>H NMR (400 MHz, CDCl<sub>3</sub>): δ= 8.14-8.11 (m, 2H), 7.65-7.61 (m, 1H), 7.27-7.24 (m, 1H), 7.09-6.98 (m, 3H), 3.87(s, 3H); <sup>13</sup>C NMR (100 MHz, CDCl<sub>3</sub>): δ= 163.7, 162.3, 160.3 (d, <sup>1</sup>J<sub>C-F</sub>=241.83 Hz), 150.5 (d, <sup>3</sup>J<sub>C-F</sub>=14.62 Hz), 138.5, 129.2, 119.7 (d, <sup>3</sup>J<sub>C-F</sub>=10.02 Hz), 114.3, 112.2 (d, <sup>2</sup>J<sub>C-F</sub>=24.39 Hz), 98.5 (d, <sup>2</sup>J<sub>C-F</sub>=28.04 Hz), 55.4; HRMS(EI) calcd for C<sub>14</sub>H<sub>10</sub>FNO<sub>2</sub> (M<sup>+</sup>): 243.0696; found: 243.0696.

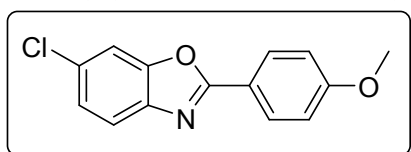**6-chloro-2-(4-methoxyphenyl)benzo[d]oxazole(3o)**

white solid; yield: 45.3 mg (35%). mp=140-142 °C; <sup>1</sup>H NMR (400 MHz, CDCl<sub>3</sub>): δ=8.16 (d, J=8.92 Hz, 2H), 7.62 (d, J=8.44 Hz, 1H), 7.55 (s, 1H), 7.32-7.29 (m, 1H), 7.03-7.01 (m, 2H), 3.89 (s, 3H); <sup>13</sup>C NMR (100 MHz, CDCl<sub>3</sub>): δ=163.8, 162.5, 150.8, 141.1, 130.1, 129.4, 125.1, 120.0, 119.2, 114.4, 111.0, 55.5; HRMS(EI) calcd for C<sub>14</sub>H<sub>10</sub>ClNO<sub>2</sub> (M<sup>+</sup>): 259.0400; found: 259.0404.

# <sup>1</sup>H and <sup>13</sup>C of all compounds

3a

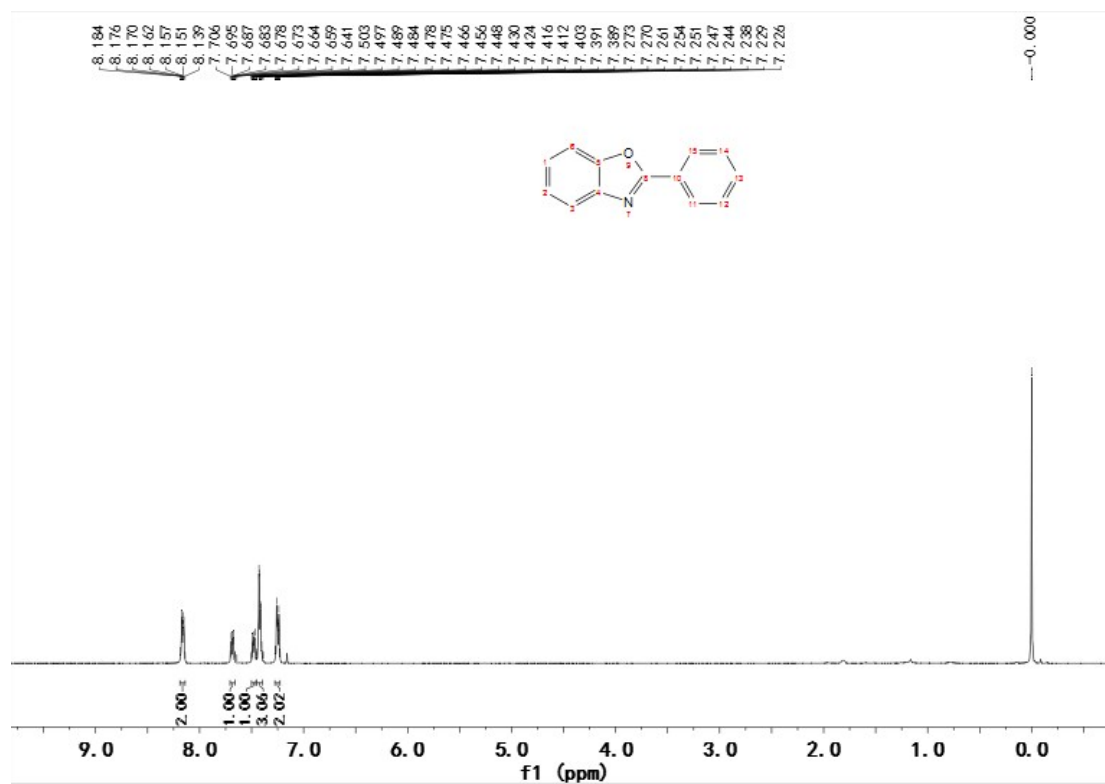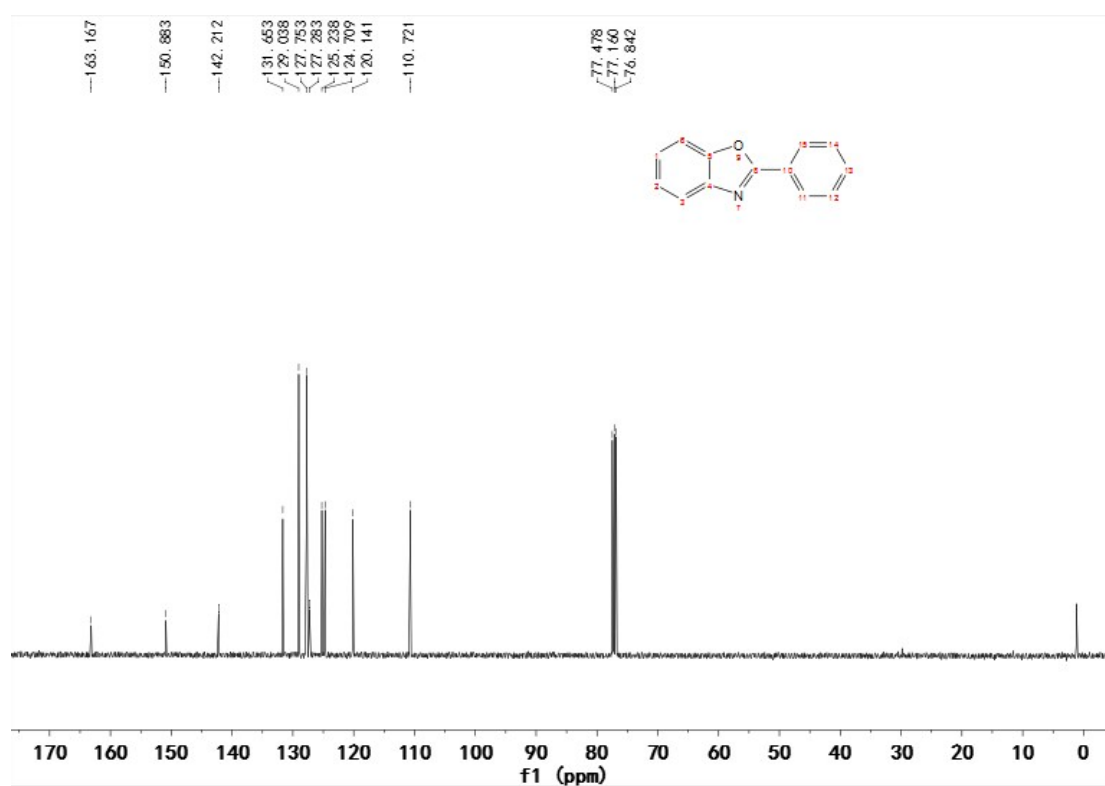

3b

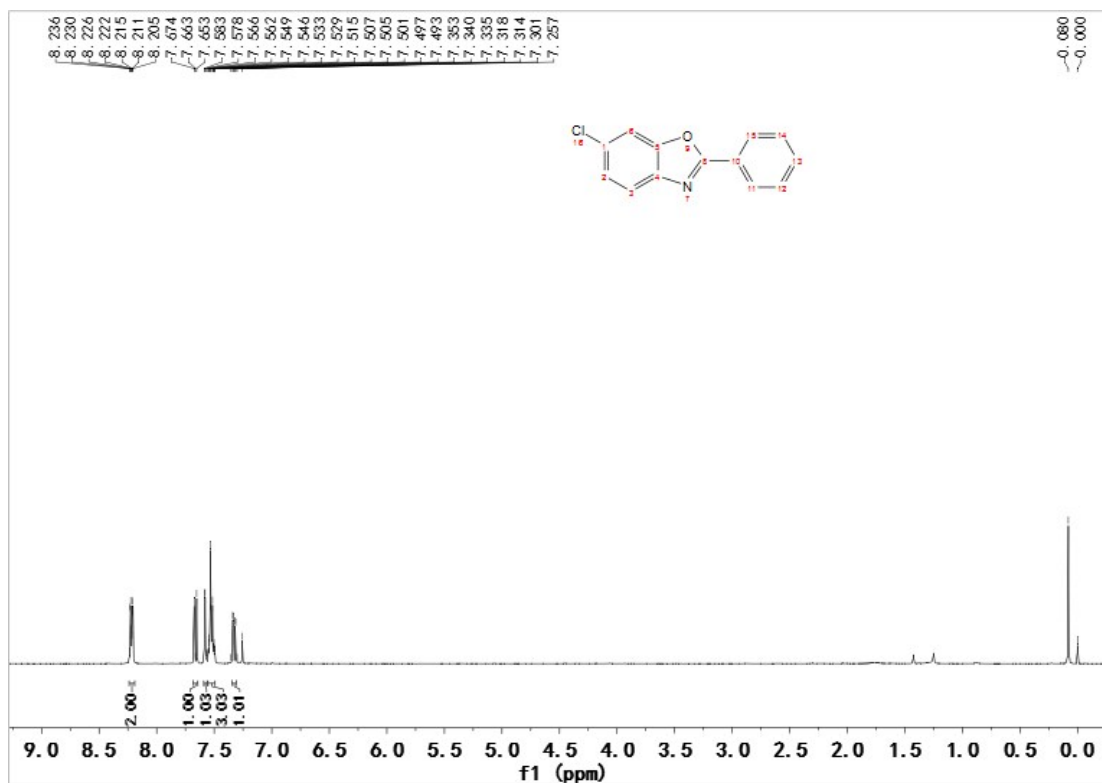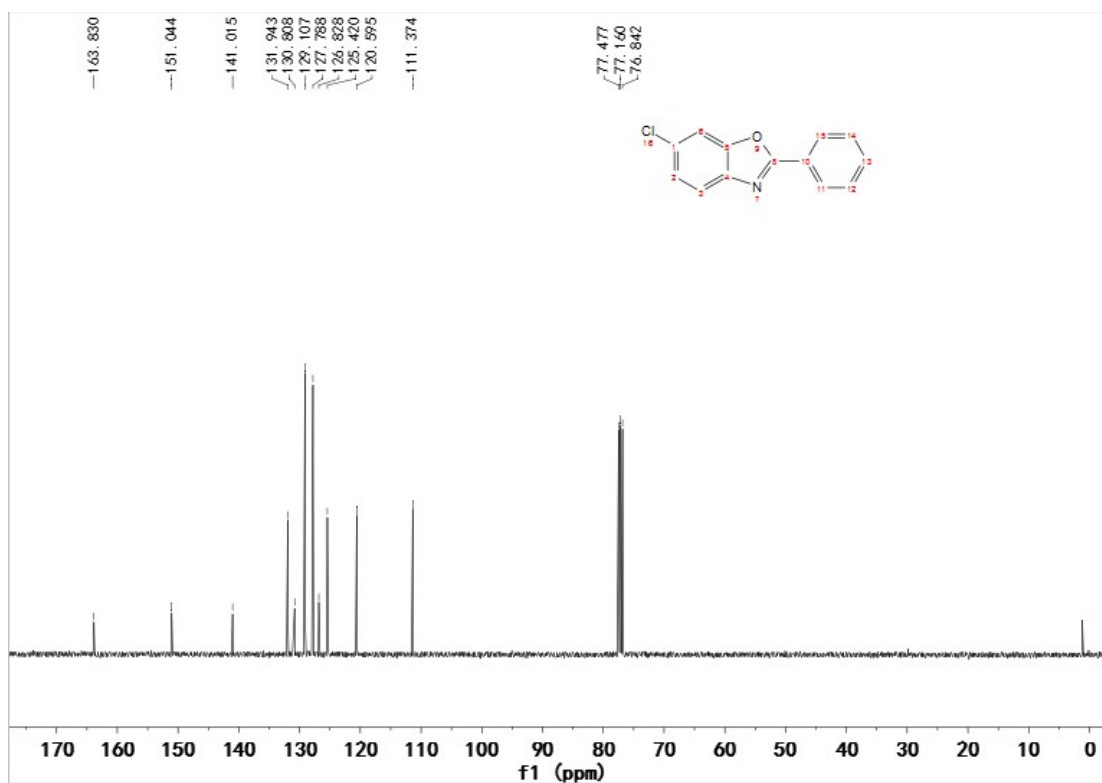

3c

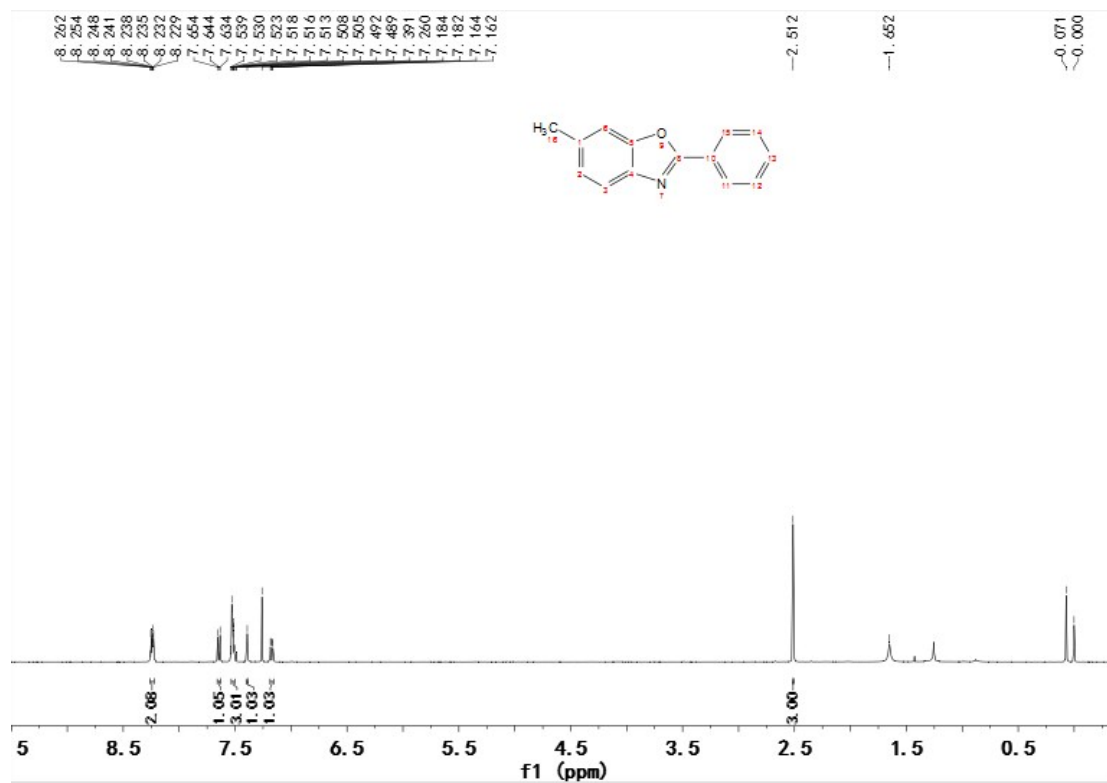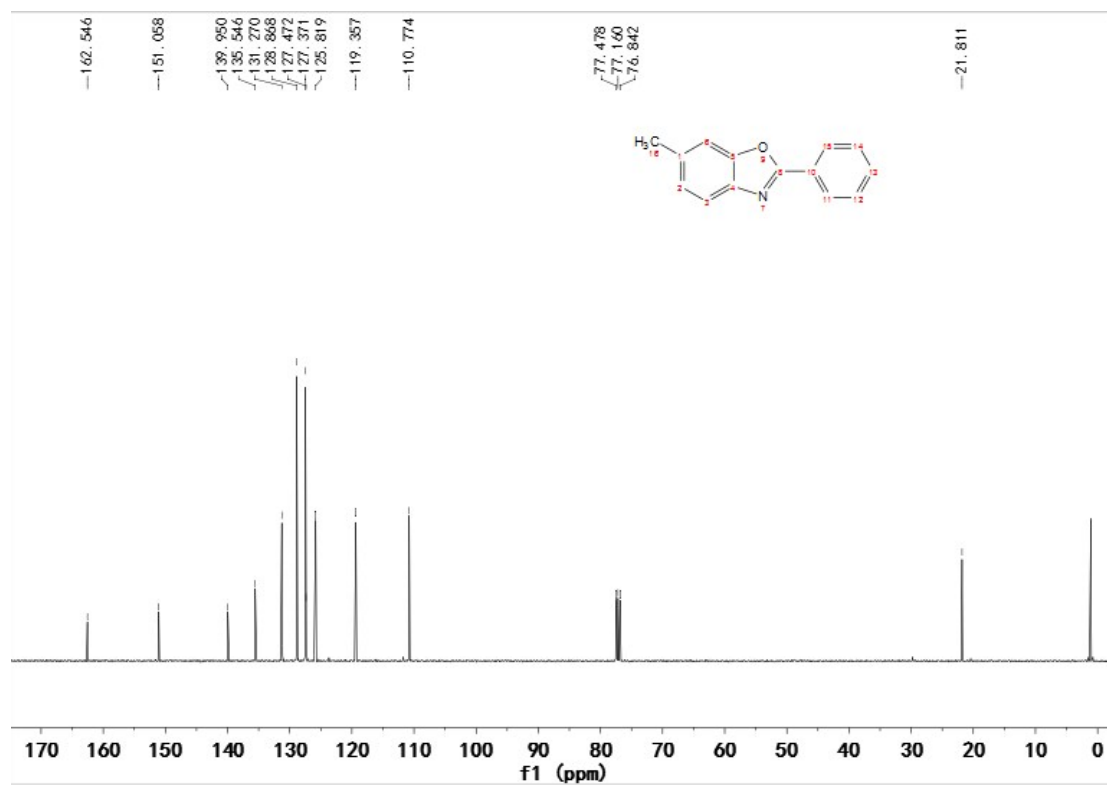



3d

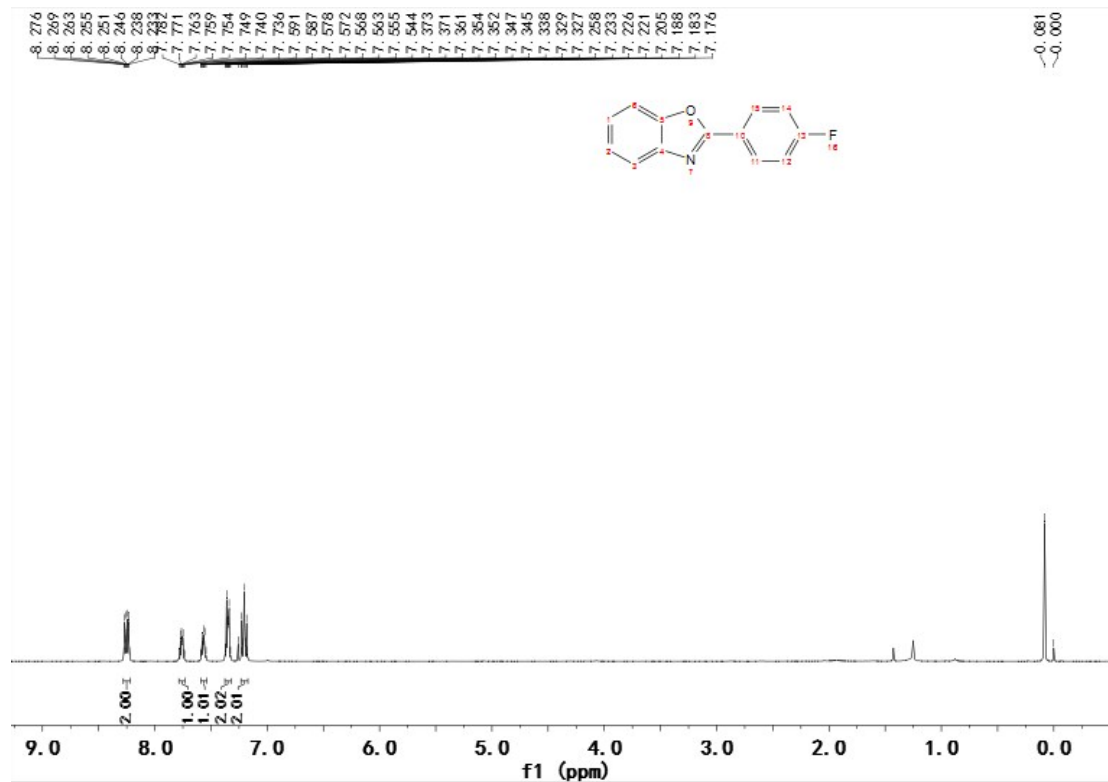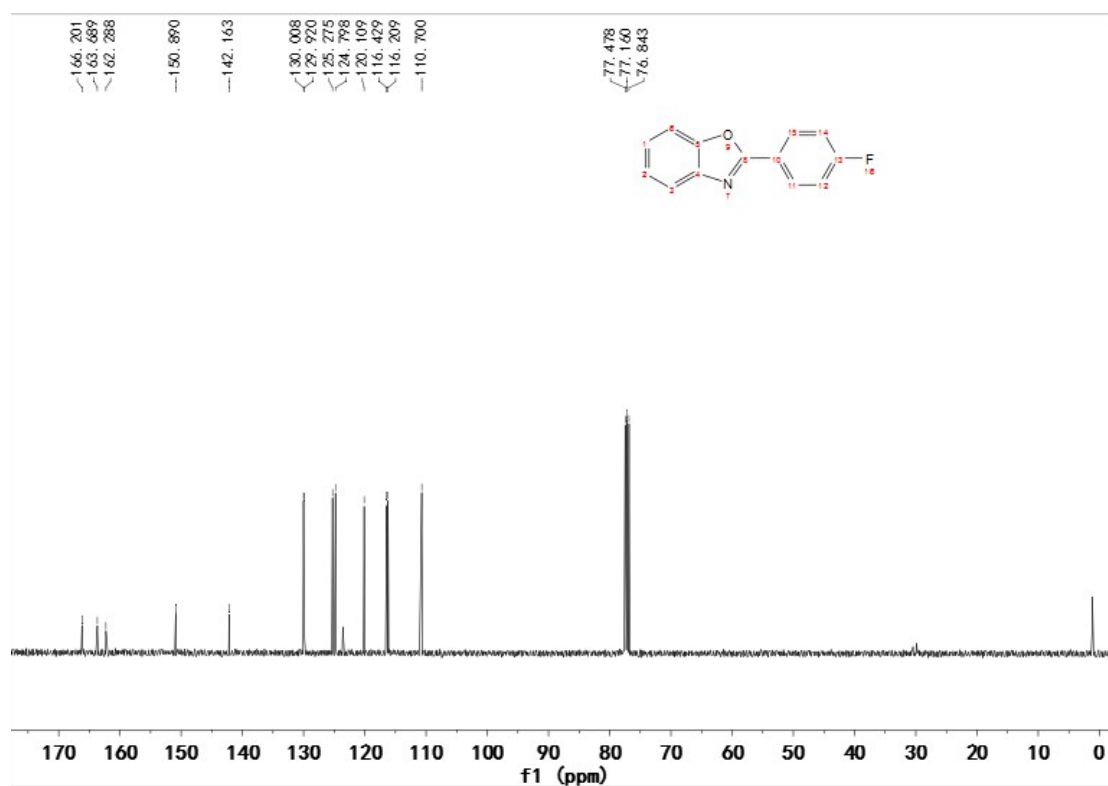

3e

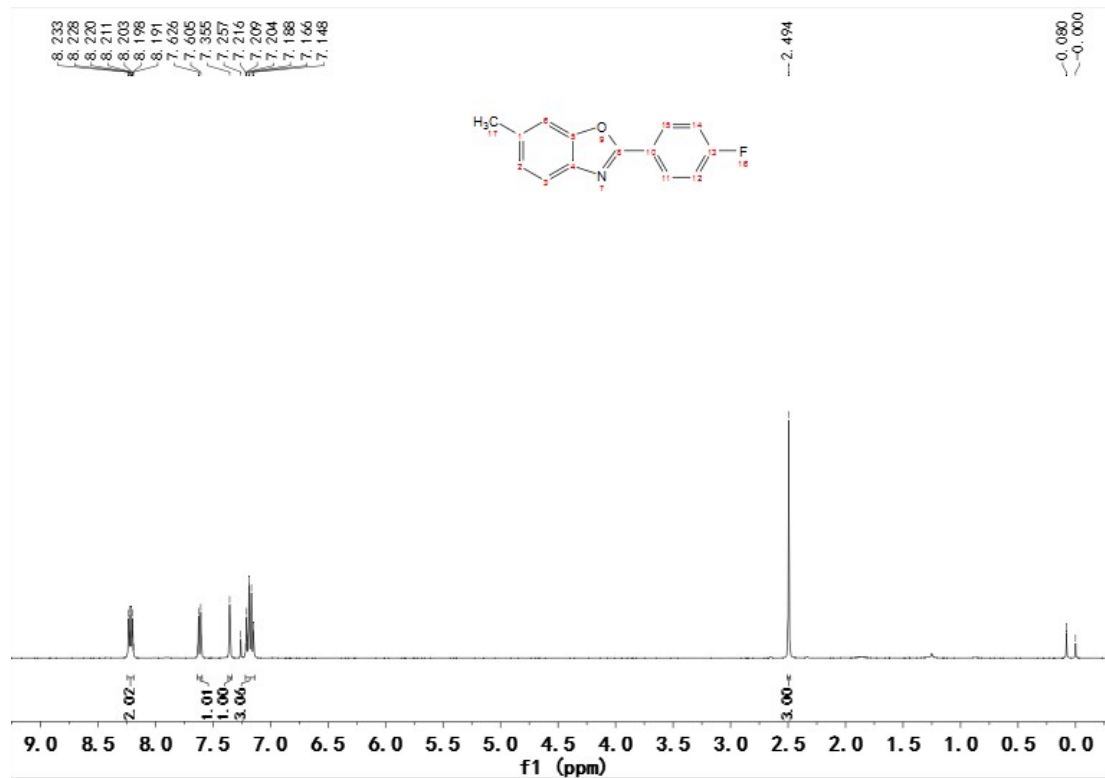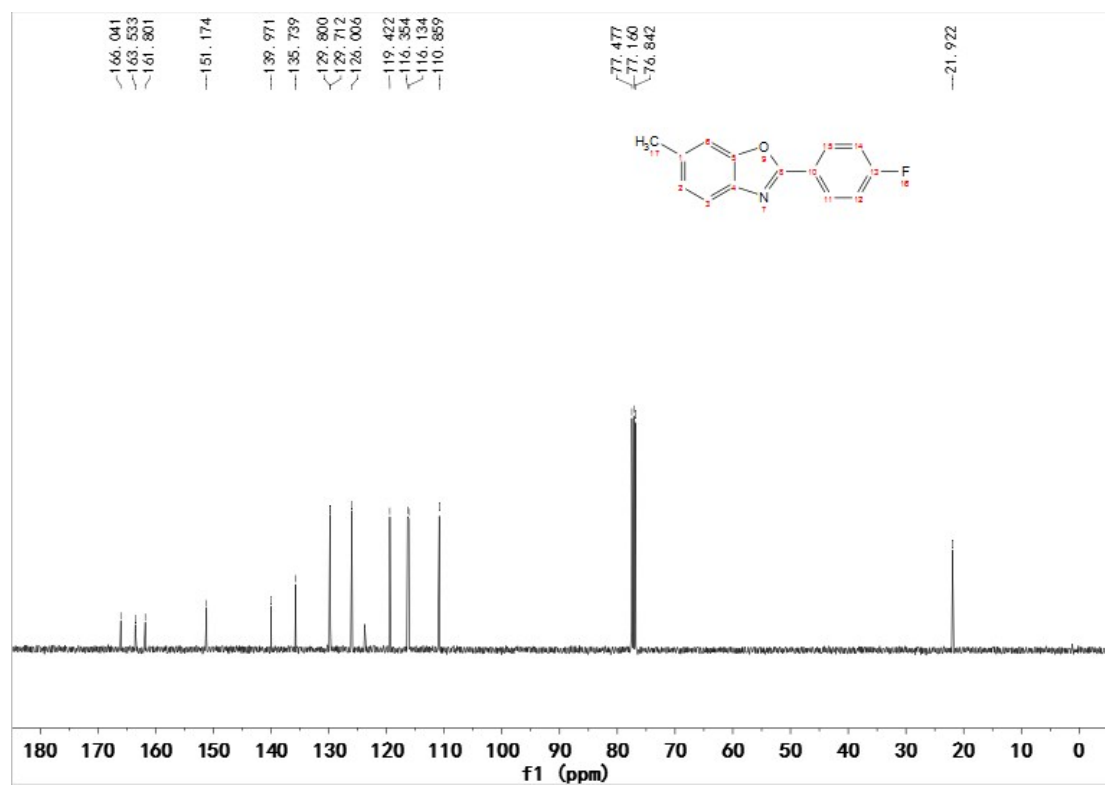

3f

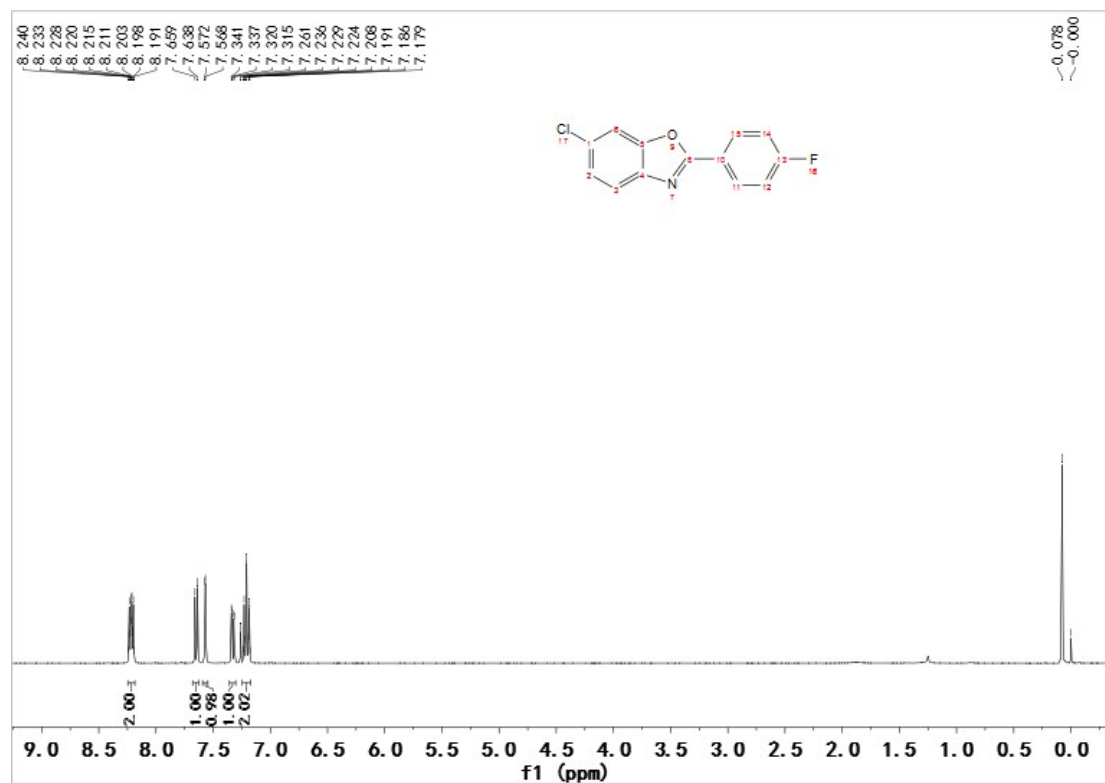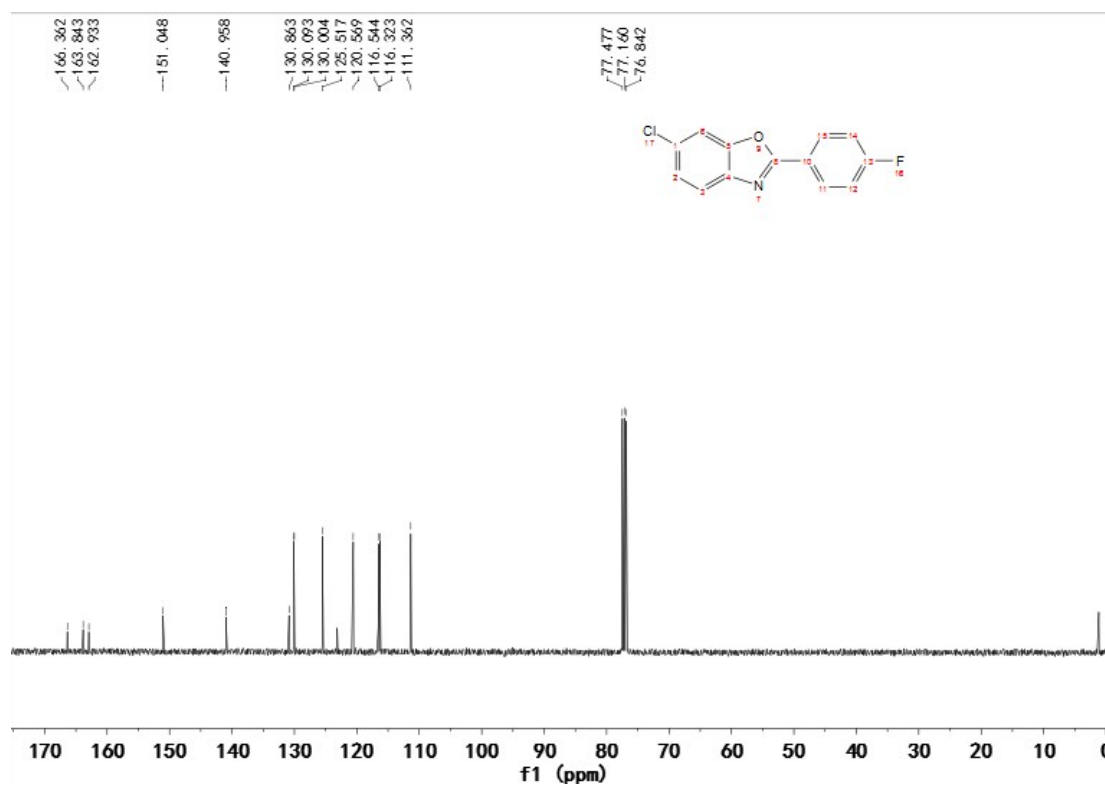

3g

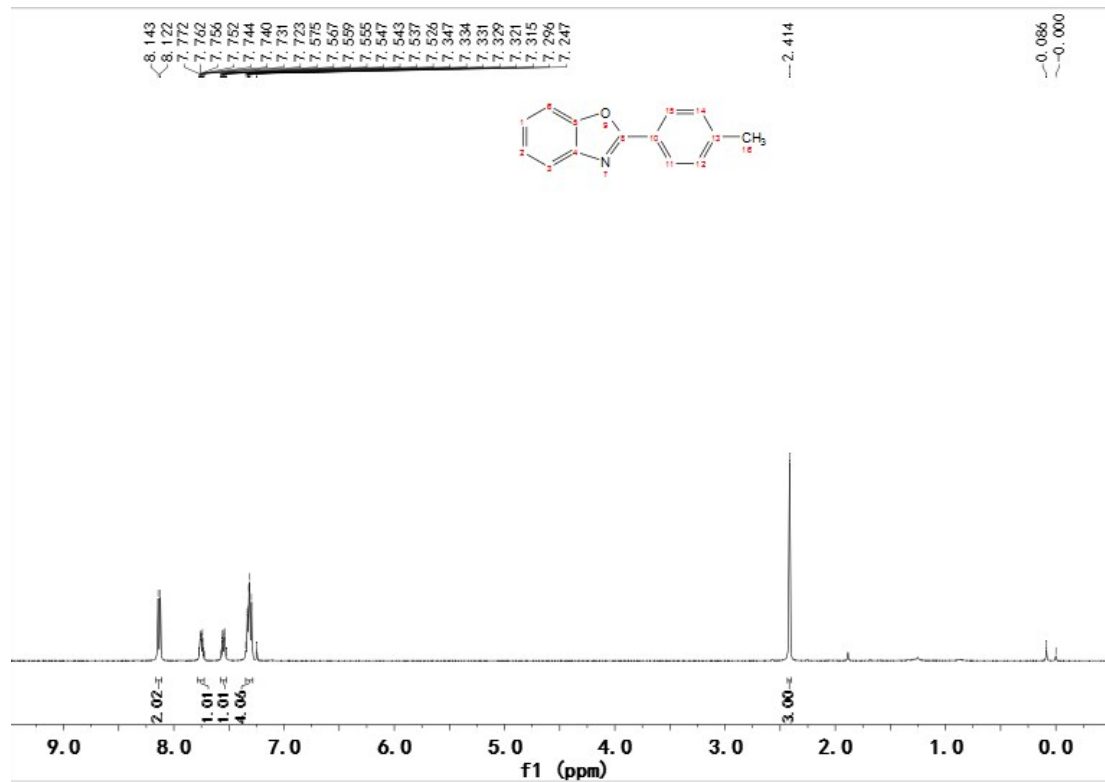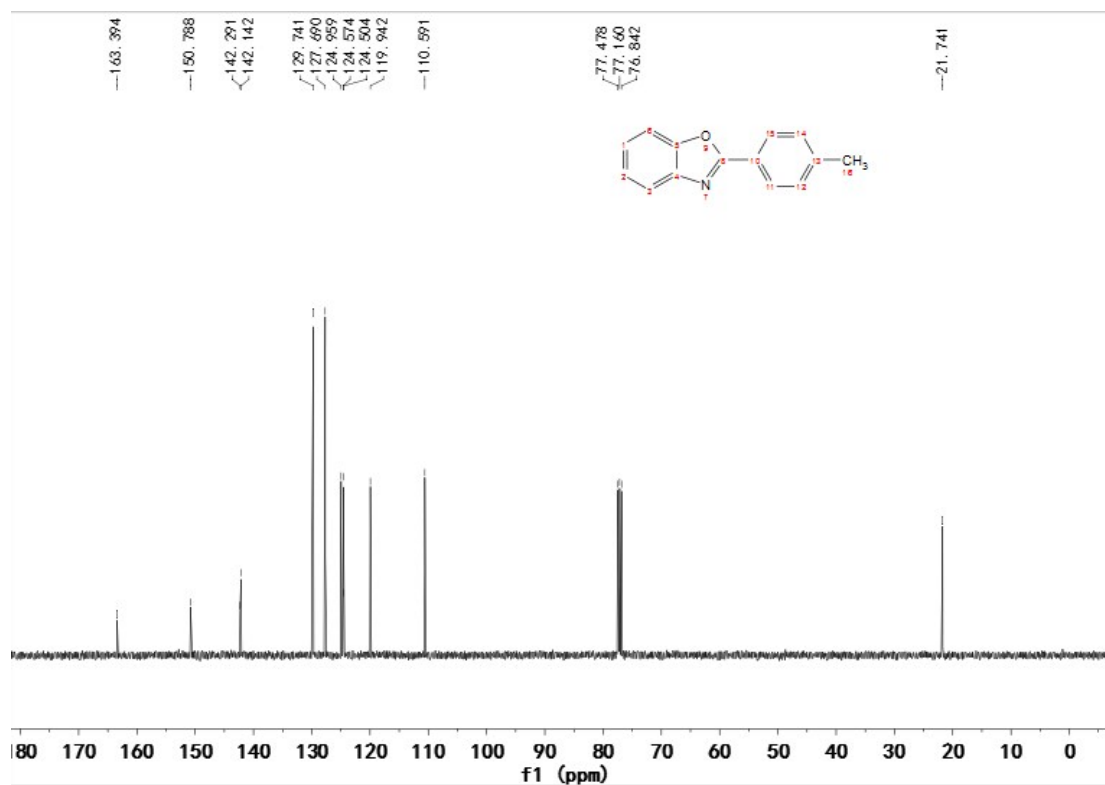

3h

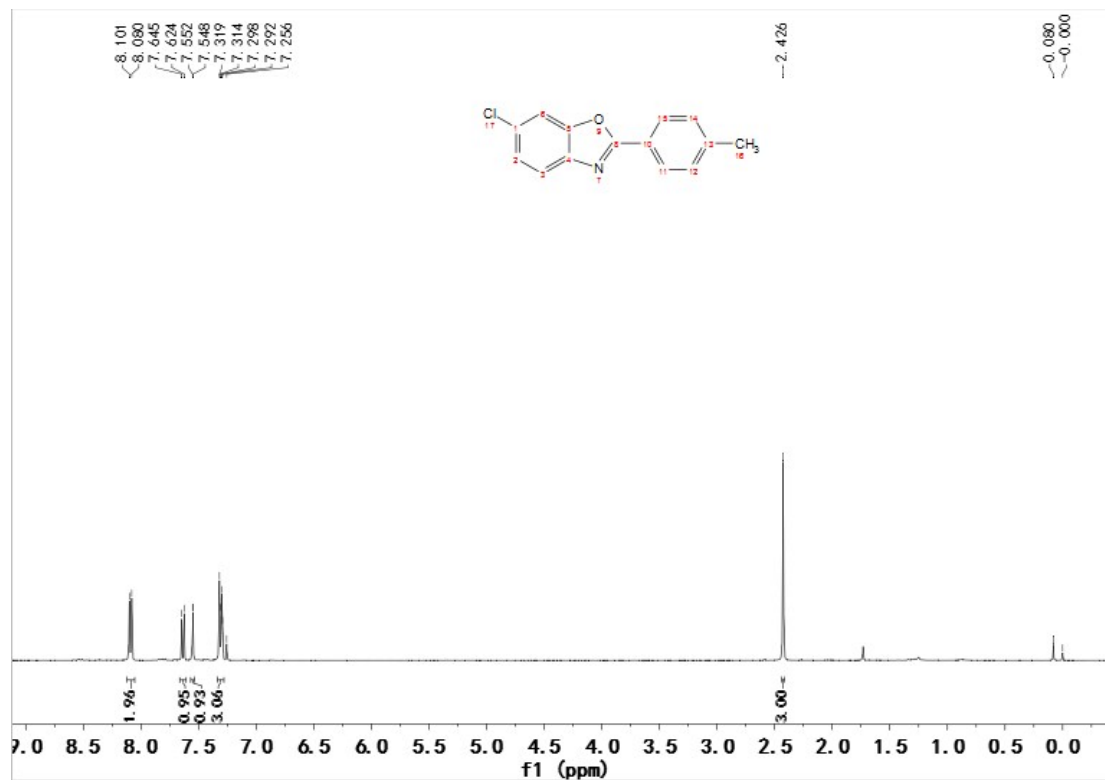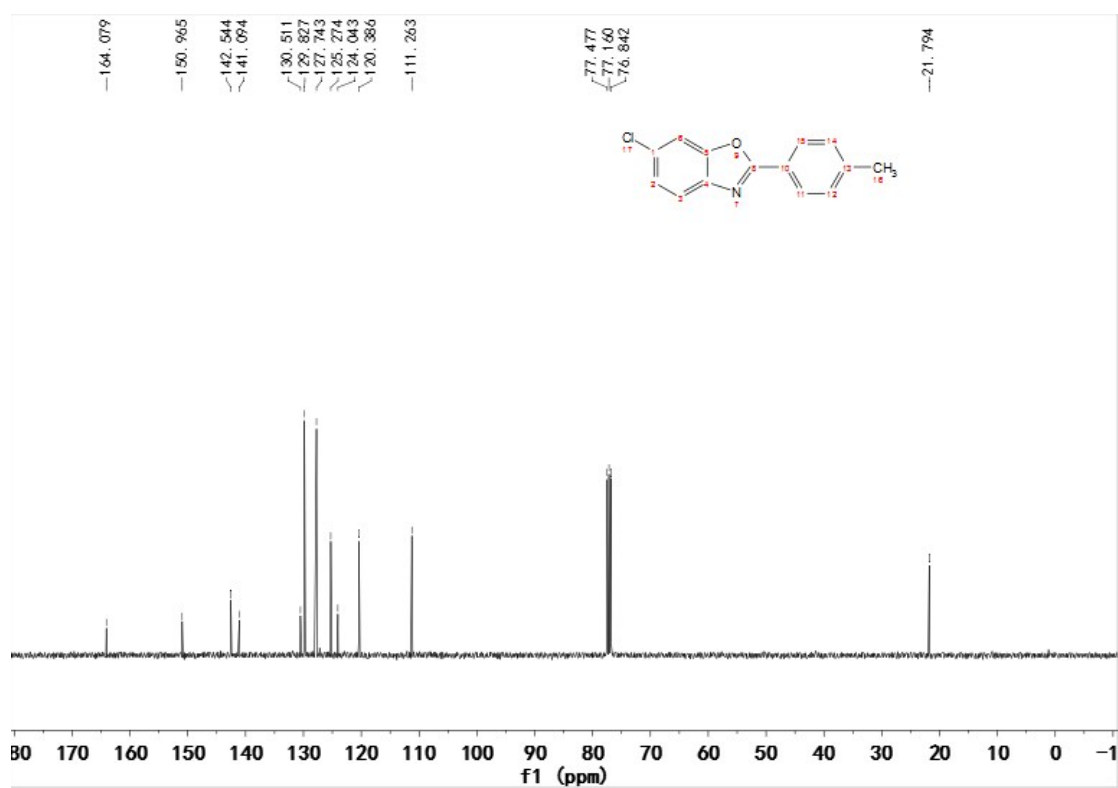

3i

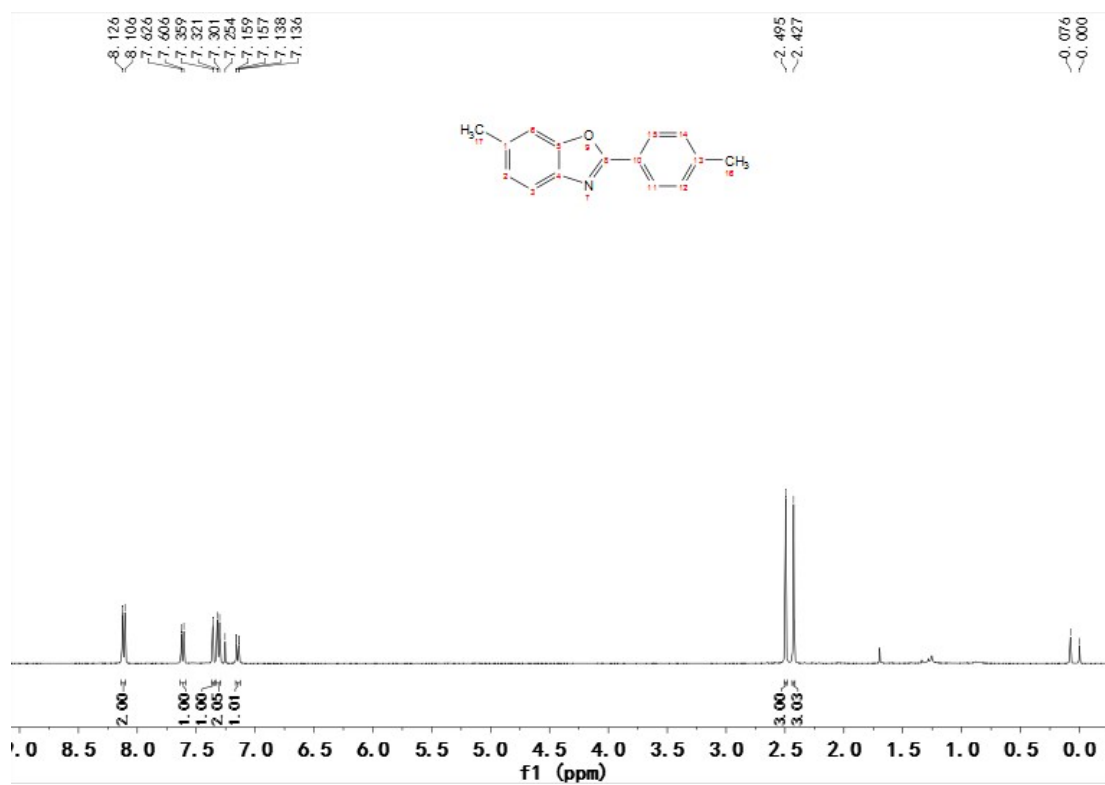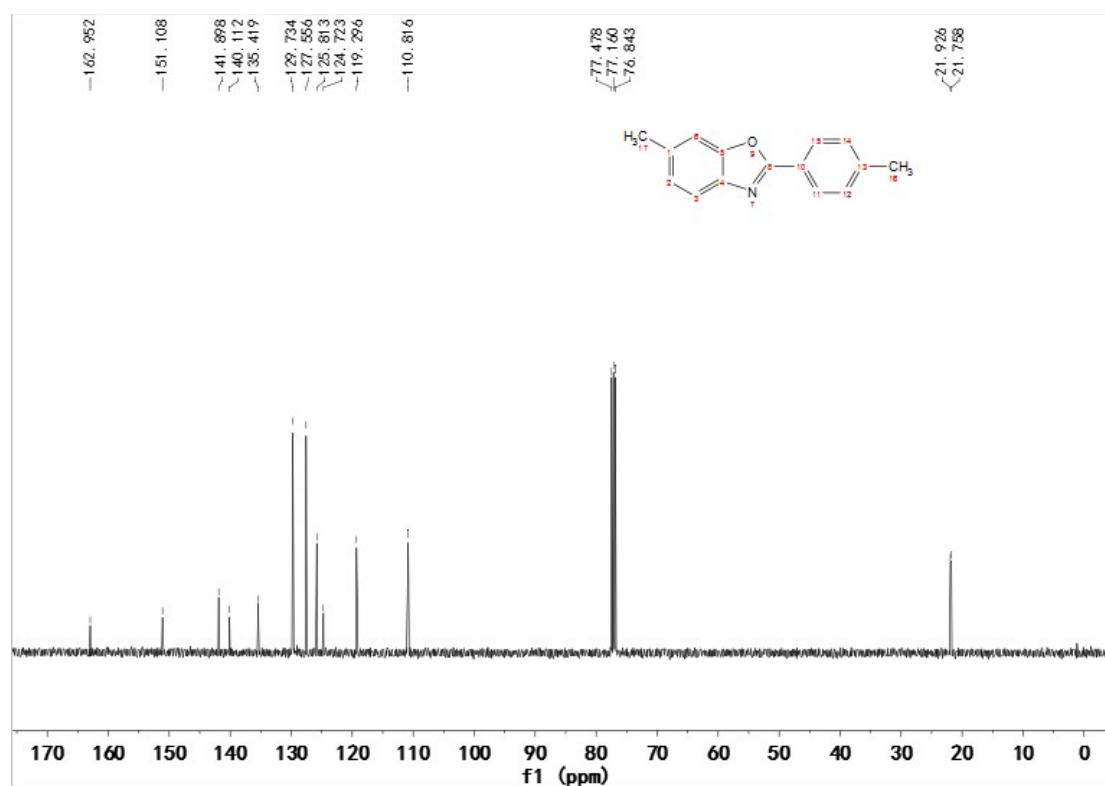

3j

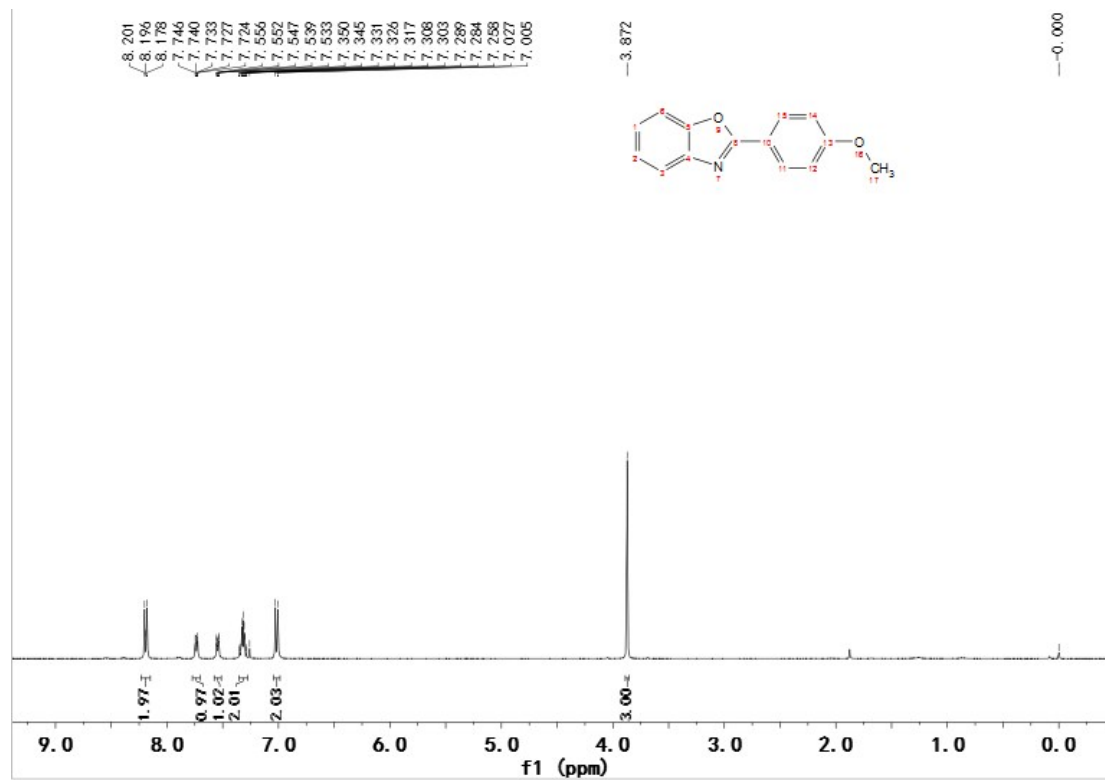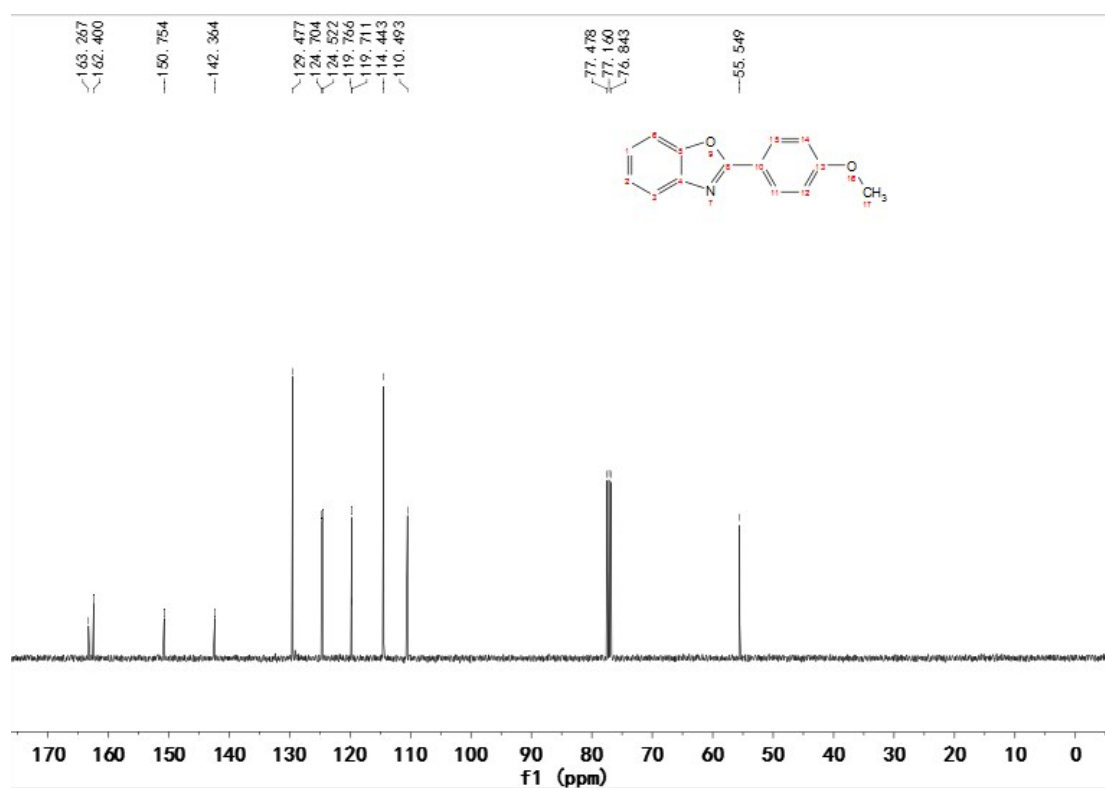

3k

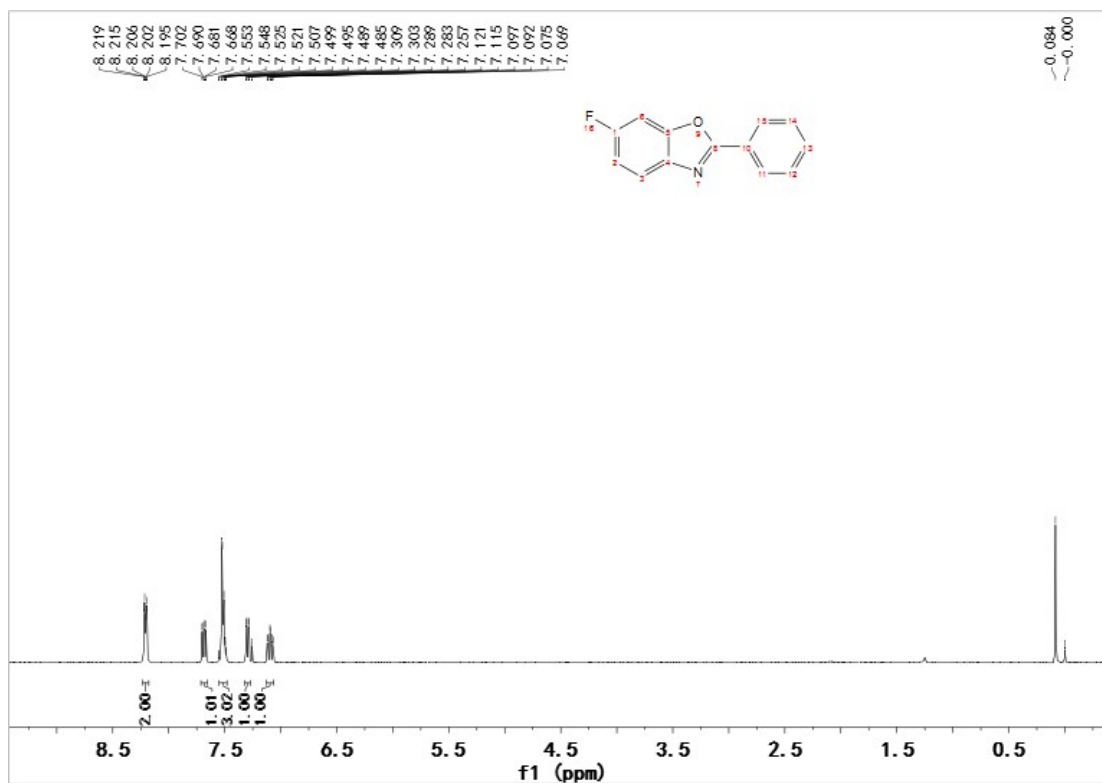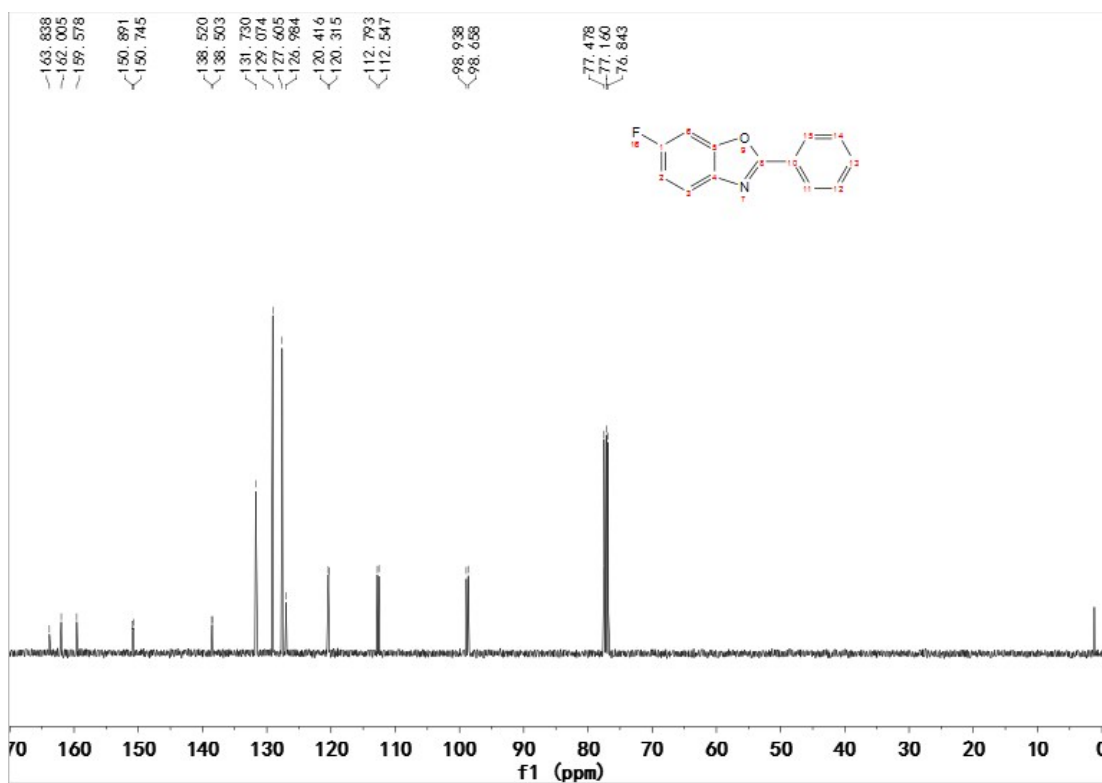



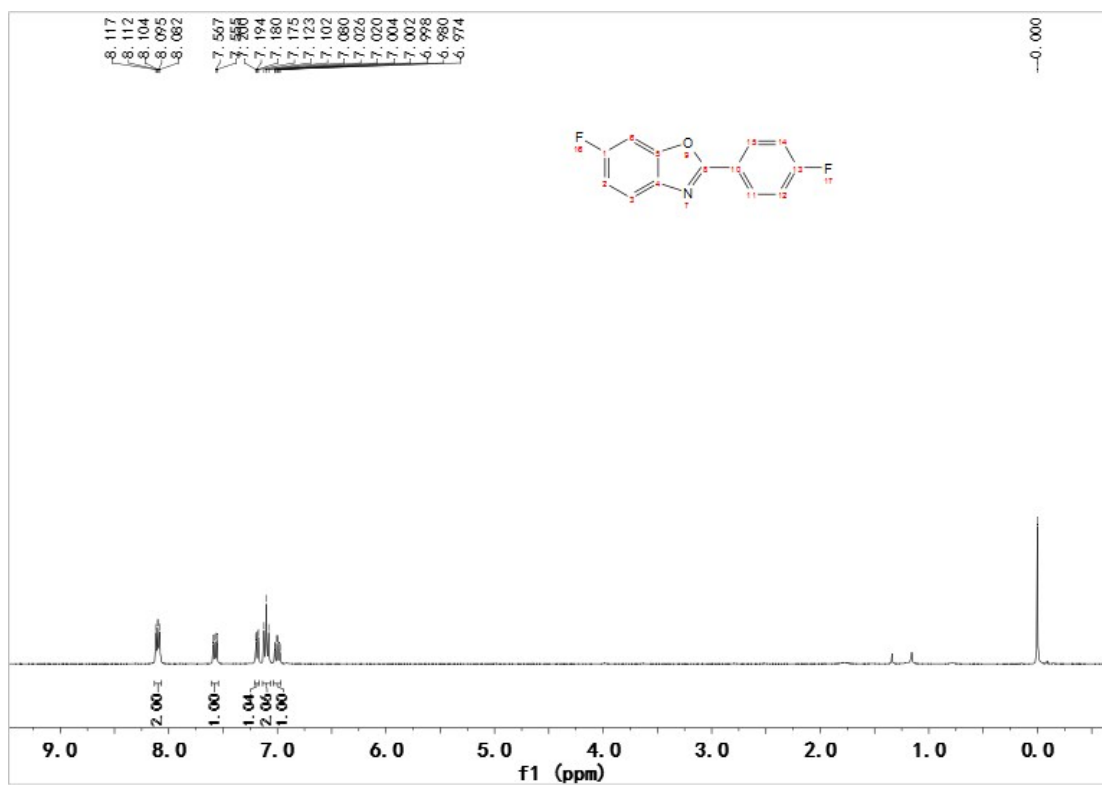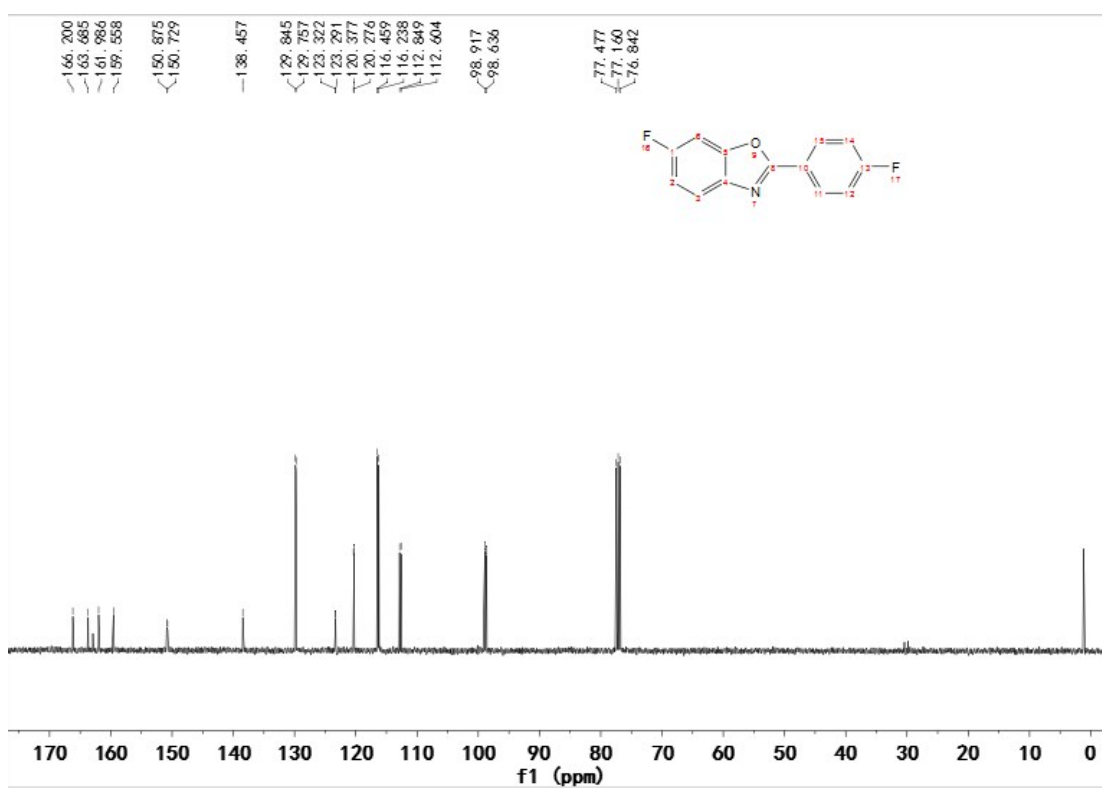

3m

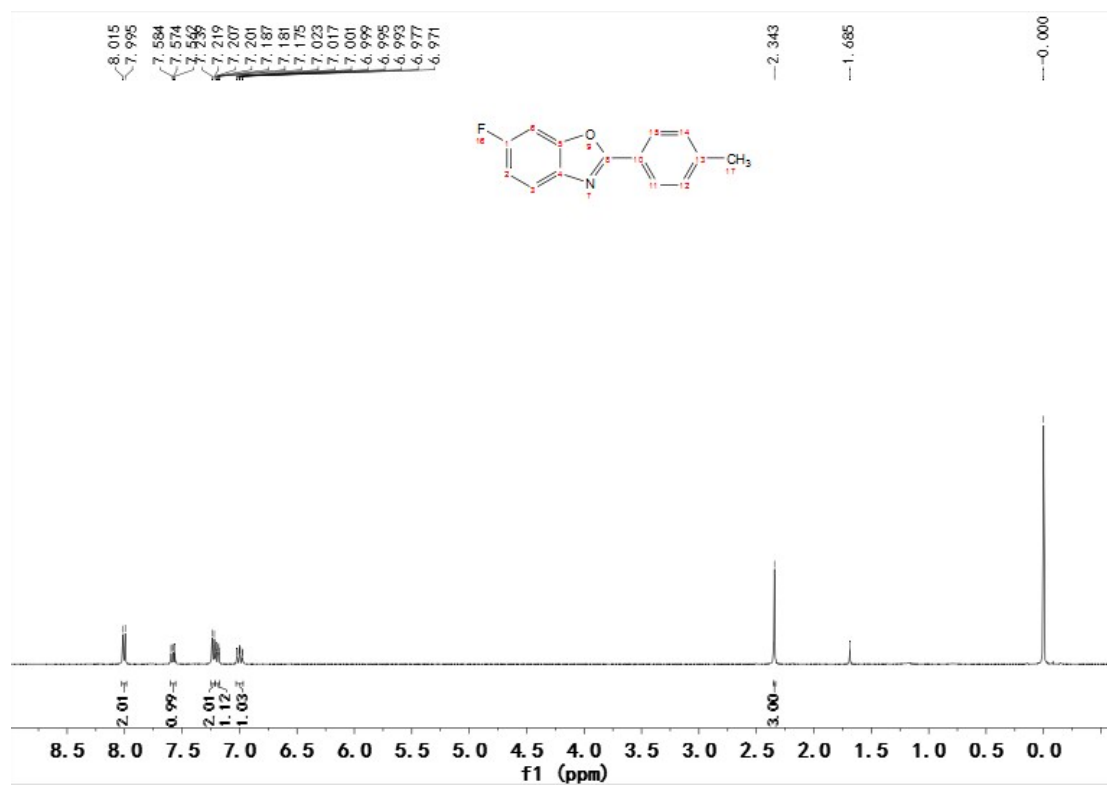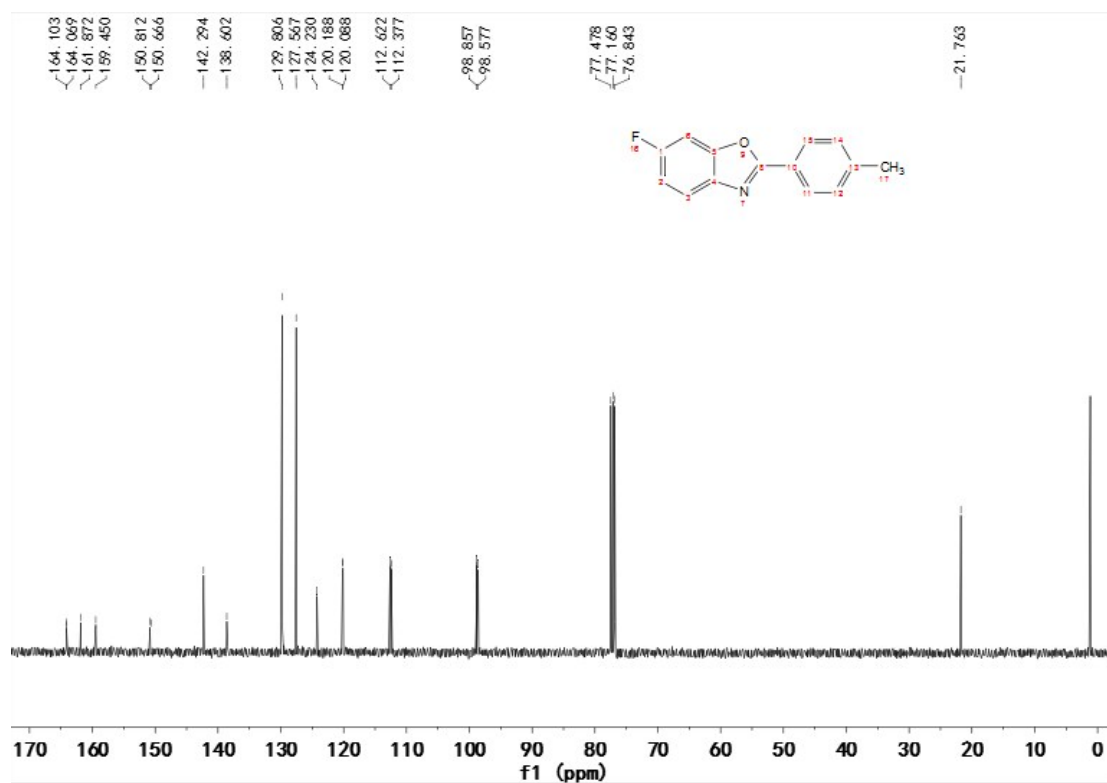

3n

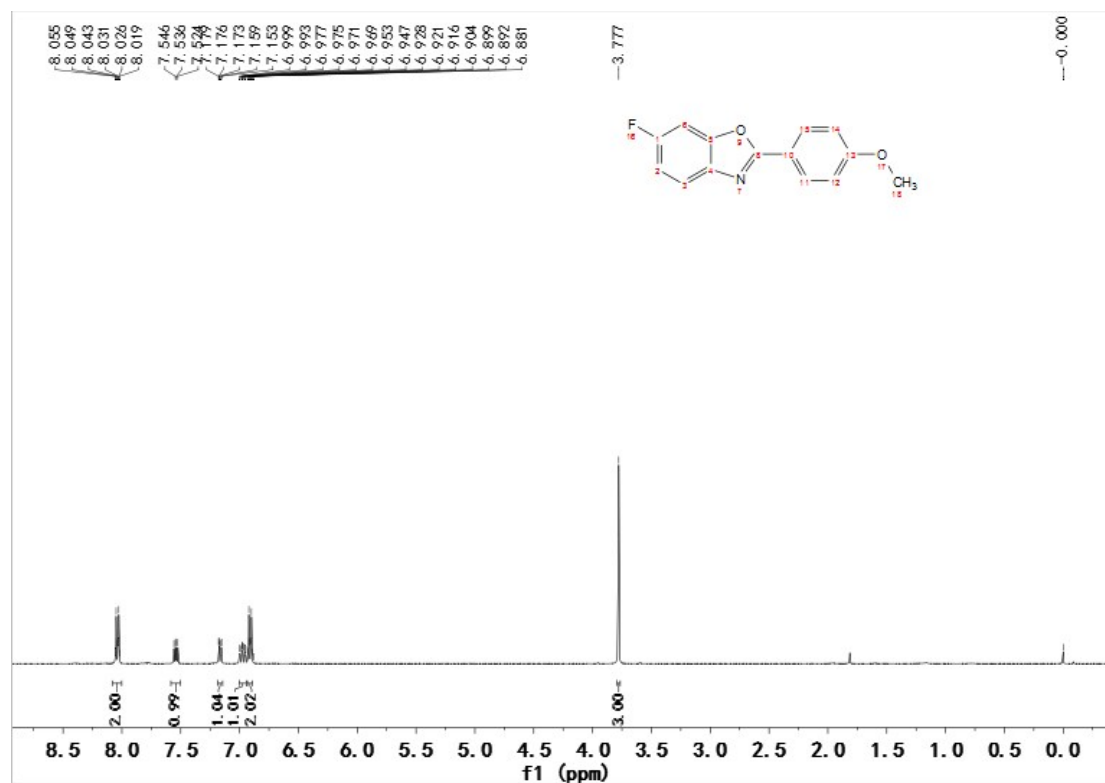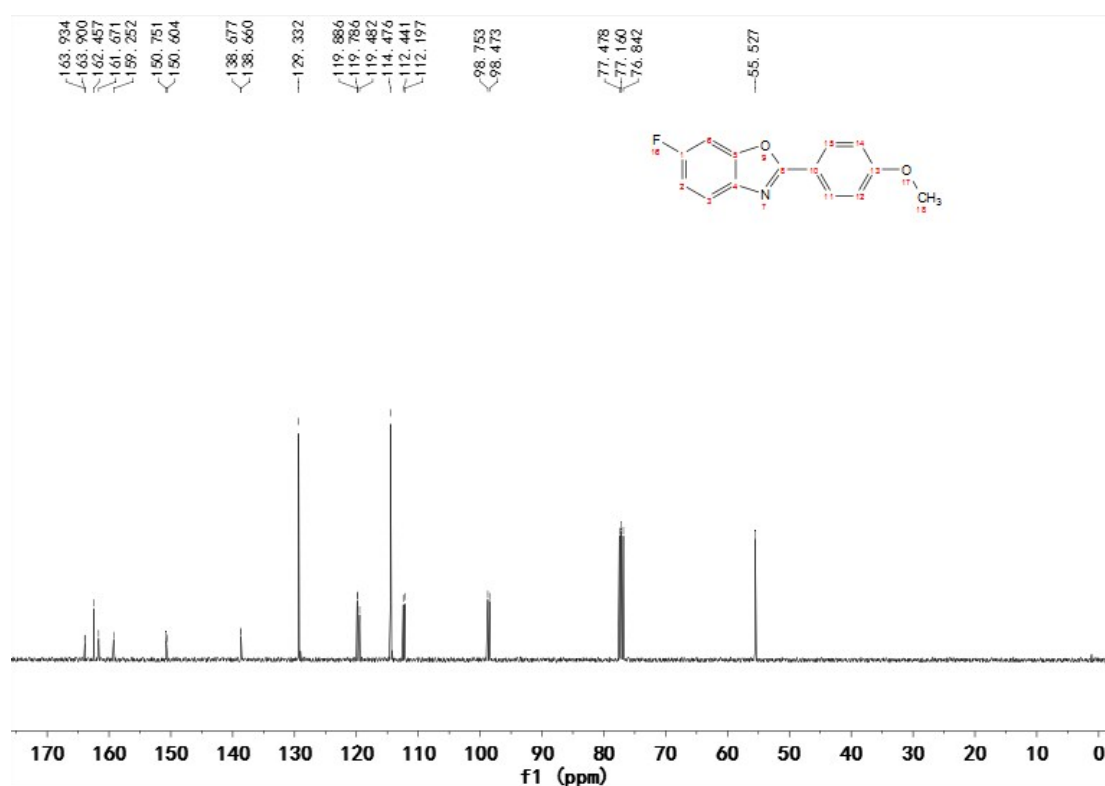

3o

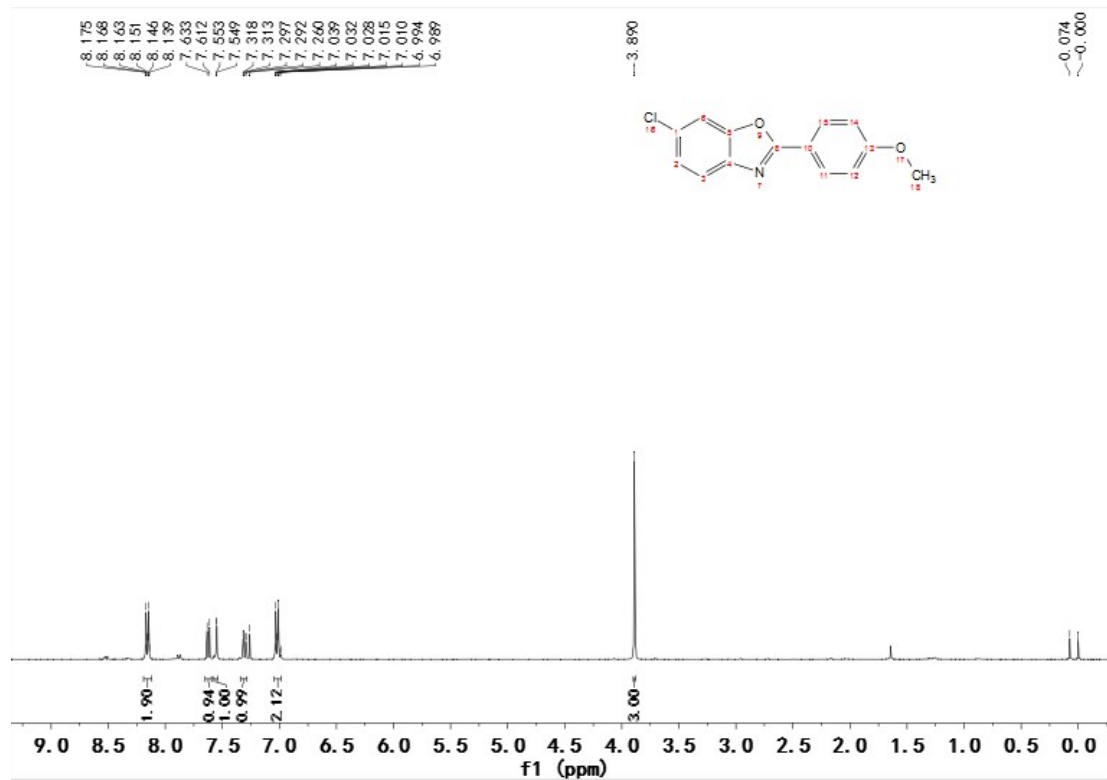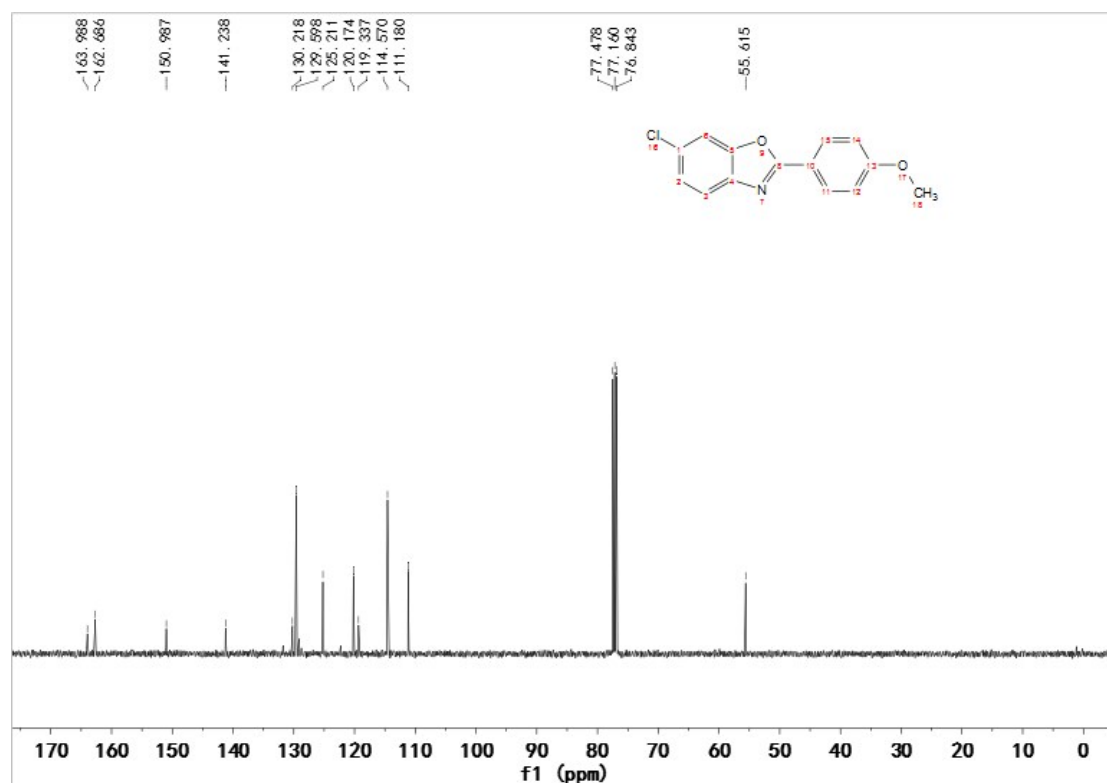

Supplement: RA-008-C7RA13080E-s001.pdf [file RA-008-C7RA13080E-s001.pdf]
